# Supplementary material for: Aeromonas hydrophila infection induces Toll-like receptor 2 (tlr2) and associated downstream signaling in Indian catfish, Clarias magur (Hamilton, 1822)
Source: PeerJ. 2021 Nov 30;9:e12411. doi: 10.7717/peerj.12411 (PMC8641487; doi:10.7717/peerj.12411)
Supplement: Supplemental Information 1 [file peerj-09-12411-s001.xlsx]

## Sheet: GRAPH
	TISSUE	TLR2 basal expression	SE
	Skin	0.997692	0.17866
	Stomach	1.81504	0.279349
	Muscle	2.24233	0.217951
	Brain	2.58838	0.982418
	Liver	10.3627	0.0944428
	Post Kidney	11.2226	0.820183
	Intestine	15.1895	0.204008
	Heart	18.4856	0.205798
	ARO	34.0598	0.240069
	Ant Kidney	35.4243	0.0781558
	Gill	67.0268	0.276632
	Spleen	72.5884	0.543119
	TISSUE	IL1β basal expression	SE		TISSUE	IL1β basal expression	SE
	Spleen	26.4464	0.144338		Muscle	1	0.192058
	Anterior Kidney	25.6639	0.137427		Stomach	1.41912	0.146401
	Gill	20.9179	1.2237		Brain	1.52802	0.0718215
	Intestine	20.1355	0.916974		Skin	1.52802	0.383699
	Respiratory Organ	5.98631	0.10142		Heart	2.18606	1.14526
	Posterior Kidney	4.47949	0.404104		Liver	2.85799	0.299504
	Liver	2.85799	0.299504		ARO	5.98631	0.784104
	Heart	2.18606	1.14526		Post Kidney	8.95897	0.40142
	Skin	1.52802	0.383699		Intestine	20.1355	0.916974
	Brain	1.52802	0.0718215		Gill	20.9179	1.2237
	Stomach	1.41912	0.146401		Ant Kidney	25.6639	0.137427
	Muscle	1	0.192058		Spleen	26.4464	0.344338
	TISSUE	NFkβ BASAL EXPRESSION	SE
1	Muscle	1	0.459577
2	Stomach	1.0293	0.331239
3	Heart	2.7384	0.963735
4	ARO	3.10947	0.753271
5	Brain	4.53154	0.378399
6	Liver	9.4917	2.14919
7	Skin	12.981	0.591235
8	Intestine	13.4543	0.601736
9	Post Kidney	19.7667	1.60115
10	Gill	34.2791	3.30458
11	Spleen	48.3871	0.777373
12	Ant Kidney	52.2325	2.4688
	TISSUE	MYD88 BASAL EXPRESSION	SE
1	Muscle	1	0.461772
2	Brain	1.14208	0.196857
3	Heart	4.90187	0.40652
4	Liver	5.32089	0.461628
5	ARO	9.78112	3.31619
6	Stomach	13.7688	1.25193
7	Intestine	17.089	0.657104
8	Skin	26.9398	0.952393
9	Post Kidney	47.4499	3.20216
10	Ant Kidney	52.4062	1.95808
11	Gill	58.7561	3.92492																						GILL	LIVER	SPLEEN	INTESTINE	KIDNEY
12	Spleen	67.493	5.19942																					1	1	1	1	1	1
																								1	1	1	1	1	1
																								1	1	1	1	1	1
	Modulation of TLR2																							2	0.617	0.239	8.21541	1.17013	3.87716
	Tissue	Fold change	SE				Tissue	Fold change	SE															2	0.228	0.04	3.81937	3.09871	2.96905
	A3G	0.483163	0.127537			Gill	Control	1	0.192058															2	0.604	0.122	3.79298	1.11471	3.24901
	A3L	0.133512	0.0577604				3h	0.483163	0.127537															3	2.8219	0.742262	6.51305	3.24151	0.199344
	A3SP	5.27592	1.16655				8h	2.24051	0.29															3	1.67791	0.493116	1.90968	3.88164	0.320486
	A3K	3.36507	0.588601				24h	4.3182	0.0391917															3	2.2217	0.376312	5.66994	5.58542	0.353145
	A3IN	1.79451	2.01658				72h	0.754395	0.126366															4	0.246558	0.428292	3.62589	0.486327	0.15195
							144h	0.748945	0.0990009															4	0.326465	0.669737	2.49666	3.18215	0.0845921
																								4	0.381565	0.48858	1.87688	0.537747	0.114361
						Liver	Control	1	0.192058															5	0.5	0.72	2.17598	0.715323	0.573686
	A8G	2.24051	1.29356				3h	2.13351	0.0577604															5	0.85	0.82	0.491978	1.68374	1.97019
	A8L	0.53723	0.107919				8h	4.53723	0.107919															5	0.91	0.81	1.40607	0.435778	0.58574
	A8SP	4.69756	0.211475				24h	2.52887	0.072552															6	0.584389	1.09682	0.259415	0.797377	1.22688
	A8K	0.290992	0.0467836				72h	0.783951	0.0300174															6	0.926588	3.63847	0.268563	0.629961	3.605
	A8IN	4.23619	0.702751				144h	0.520153	0.0493924															6	0.735858	2.82516	0.263949	0.708742	2.10307
						Spleen	Control	1	0.192058
							3h	5.27592	0.166554
	A24G	0.318196	0.0391917				8h	4.69756	0.211475
	A24L	0.52887	0.072552				24h	2.66647	0.307665
	A24SP	2.66647	0.0430538				72h	1.35801	0.449296
	A24K	0.116968	0.0194881				144h	0.263976	0.0474127
	A24IN	1.40207	0.0288867
						Intestine	Control	1	0.192058
							3h	5.79451	0.540734
	A72G	0.754395	0.126366				8h	7.23619	0.202751
	A72L	0.783951	0.0300174				24h	3.40207	0.428887
	A72SP	1.35801	0.449296				72h	0.944946	0.0547175
	A72K	1.0432	0.463505				144h	0.712027	0.0483568
	A72IN	0.944946	2.05472
						Kidney	Control	1	0.192058
							3h	3.36507	0.588601
	A6DG	0.748945	0.0990009				8h	3.29099	0.546784
	A6DL	3.73298	0.749392				24h	6.11697	0.519488
	A6DSP	0.263976	0.0474127				72h	1.0432	0.463505
	A6DK	2.31165	0.69438				144h	2.31165	0.69438
	A6DIN	0.712027	0.0483568
																								GILL	LIVER	SPLEEN	KIDNEY	INTESTINE
	MYD88 EXPRESSION IN RESPONSE TO A Hydrophila																						1	1	1	1	1	1
		MEAN	SE			Tissue	Fold change	SE															1	1	1	1	1	1
	A3GM88	1.43087	0.12065		Gill	Control	1	0.192058															1	1	1	1	1	1
	A3LM88	10.3255	1.6687			3h	1.43087	0.12065															2	1.23257	10.0445	10.941	20.6538	27.5059
	A3SPM88	6.70485	2.26271			8h	3.20697	1.08108															2	1.41095	7.58597	3.20798	37.3577	33.1668
	A3KM88	25.6067	5.89956			24h	4.9655	1.47651															2	1.64909	13.346	5.9656	18.8088	22.8903
	A3INM88	27.8543	2.97166			72h	0.613013	0.0877758															3	1.0656	1.41258	20.7974	39.7624	21.0634
						144h	0.984956	0.347941															3	4.53677	1.05946	10.9663	31.8525	30.204
	A8GM88	3.20697	1.08108																				3	4.01853	1.65099	10.6172	38.1427	53.5074
	A8LM88	0.0858966	0.0107392		Liver	Control	1	0.192058															4	3.85928	0.51943	5.91072	16.8538	51.2685
	A8SPM88	14.127	3.33675			3h	6.32548	1.6687															4	4.3873	1.01045	8.01851	5.55967	69.4707
	A8KM88	36.5858	2.41244			8h	15.3743	1.17183															4	6.6499	2.07772	5.34553	9.22149	45.8336
	A8INM88	34.9249	1.5526			24h	7.20253	0.459977															5	0.479078	0.772889	5.2537	3.91768	5.45155
						72h	3.12778	0.2312															5	0.778265	1.0485	2.55502	3.93128	6.87646
	A24GM88	4.9655	0.855886			144h	3.08671	0.432214															5	0.581694	1.56193	5.65032	8.4855	6.78179
	A24LM88	0.683104	0.163674																				6	0.453236	2.37019	2.27626	1.11471	1.05824
	A24SPM88	6.42492	0.813326		Spleen	Control	1	0.192058															6	1.63959	3.86375	2.18354	0.753493	0.312443
	A24KM88	10.545	3.32681			3h	6.70485	2.26271															6	0.862044	3.02618	2.22942	0.916475	0.575013
	A24INM88	55.5243	7.14755			8h	14.127	3.33675
						24h	26.4249	3.81333
	A72GM88	0.613013	0.0877758			72h	4.48635	1.97243
	A72LM88	0.27532	0.105815			144h	2.22974	0.026768
	A72SPM88	4.48635	0.972428
	A72KM88	5.44482	1.52035		Intestine	Control	1	0.192058
	A72INM88	6.36994	0.460005			3h	27.8543	2.97166
						8h	34.9249	9.65865
	A6DGM88	0.984956	0.347941			24h	55.5243	7.14755
	A6DLM88	1.54335	0.216107			72h	4.31527	1.25029
	A6DSPM88	2.22974	0.026768			144h	0.648565	0.218411
	A6DKM88	0.928225	0.17682
	A6DINM88	0.648565	0.218411		Kidney	Control	1	0.192058
						3h	25.6067	5.89956
						8h	36.5858	2.41244
						24h	60.545	3.32681
						72h	5.44482	1.52035
						144h	0.928225	0.17682			NFkB
											GILL	LIVER	SPLEEN	KIDNEY	INTESTINE
	NFkB	MEAN	SE			Tissue	Fold change	SE		1	1	1	1	1	1
	A3GNFkB	3.16251	0.442395		Gill	Control	1	0.192058		1	1	1	1	1	1
	A3LNFkB	21.7378	8.78899			3h	3.16251	0.442395		1	1	1	1	1	1
	A3SPNFkB	15.7136	5.22113			8h	6.30135	1.51705		2	3.3909	39.3057	26.1426	36.6735	42.8632
	A3KNFkB	28.7881	5.24571			24h	2.0728	0.475107		2	2.30804	13.4699	10.0445	30.8386	46.7426
	A3INNFkB	42.1355	2.89291			72h	5.46313	0.443741		2	3.7886	12.4379	10.9536	18.8523	36.8008
						144h	1.29121	0.536038		3	5.90389	1.67985	24.6184	58.892	115.094
	A8GNFkB	6.30135	1.51705							3	9.10505	0.759611	13.8007	28.0514	124.213
	A8LNFkB	0.11641	0.0672095		Liver	Control	1	0.192058		3	3.89512	0.802923	23.5339	48.0012	105.908
	A8SPNFkB	20.651	3.43944			3h	10.7378	1.78899		4	1.88775	1.04488	24.59	3.7886	55.0117
	A8KNFkB	44.9815	9.03004			8h	31.0808	5.29979		4	1.35817	1.08172	38.7198	3.0773	33.8637
	A8INNFkB	115.071	5.28409			24h	11.0682	4.09835		4	2.97248	1.07798	22.706	4.08877	29.8916
						72h	2.23334	0.166254		5	6.19742	1.88557	62.5382	3.03494	4.07462
	A24GNFkB	2.0728	0.475107			144h	3.00102	1.25798		5	4.66432	2.75108	24.3638	3.14196	5.08648
	A24LNFkB	0.234815	0.0983528							5	5.52765	2.06337	44.0682	4.10296	3.19688
	A24SPNFkB	28.6719	5.05329		Spleen	Control	1	0.192058		6	0.494257	1.13419	4.87364	3.00355	1.12831
	A24KNFkB	3.65156	0.299918			3h	15.7136	5.22113		6	2.31071	5.39516	10.0561	4.47431	0.820268
	A24INNFkB	39.589	7.79615			8h	20.651	3.43944		6	1.06868	2.47369	7.0007	3.6659	0.962039
						24h	48.6719	5.05329
	A72GNFkB	0.542011	0.0440247			72h	3.65675	0.0219342
	A72LNFkB	1.40692	0.166254			144h	0.310151	1.50403
	A72SPNFkB	3.66845	1.32937
	A72KNFkB	3.42662	0.33958		Intestine	Control	1	0.192058
	A72INNFkB	4.11933	0.545936			3h	42.1355	2.89291
						8h	115.071	5.28409
	A6DGNFkB	1.29121	0.536038			24h	39.589	7.79615
	A6DLNFkB	0.369133	0.0902279			72h	4.11933	0.545936
	A6DSPNFkB	7.31015	1.50403			144h	0.970206	0.0890186
	A6DKNFkB	3.71459	0.425272
	A6DINNFkB	0.970206	0.0890186		Kidney	Control	1	0.192058
						3h	28.7881	5.24571
						8h	44.9815	9.03004
						24h	103.652	15.2999
						72h	3.42662	0.33958
						144h	3.71459	0.425272
						iL1B
						TIME POINT	Fold change	SE
	iL1B	MEAN	SE		Gill	Control	1	0.192058		GILL	LIVER	SPLEEN	KIDNEY	INTESTINE
	A3GiL1B	23.3735	9.11296			3h	23.3735	9.11296	1	1	1	1	1	1
	A3LiL1B	140.248	32.9416			8h	50.501	21.1479	1	1	1	1	1	1
	A3SPiL1B	29.2307	11.4955			24h	24.9458	5.36398	1	1	1	1	1	1
	A3KiL1B	1722.62	255.602			72h	13.6442	7.98801	2	22.3934	190.019	43.6124	2076.59	20.2755
	A3INiL1B	37.4074	13.0272			144h	0.961352	0.0201946	2	8.10231	77.9783	6.50553	1865.05	28.9736
									2	39.6248	152.747	37.5741	1226.22	62.9732
	A8GiL1B	50.501	21.1479		Liver	Control	1	0.192058	3	72.7563	10.5317	91.1392	591.541	373.941
	A8LiL1B	10.065	1.49811			3h	140.248	32.9416	3	8.22491	7.26855	14.9631	504.368	437.054
	A8SPiL1B	85.873	39.5075			8h	10.065	1.49811	3	70.5219	12.3948	151.517	627.44	622.386
	A8KiL1B	574.45	36.541			24h	19.1238	4.33203	4	18.6273	27.6652	157.405	75.2351	984.559
	A8INiL1B	477.794	74.5567			72h	19.4851	3.60059	4	35.6133	13.595	208.418	26.5996	928.227
						144h	2.19059	1.0527	4	20.5968	16.1113	100.311	51.3871	1368.46
	A24GiL1B	23.8586	5.13021						5	5.95183	14.9631	110.533	7.49018	1.13682
	A24LiL1B	9.56191	2.16601		Spleen	Control	1	0.192058	5	5.36409	26.5996	98.9298	7.31065	0.949342
	A24SPiL1B	155.378	31.2242			3h	29.2307	11.4955	5	29.6166	16.8928	126.53	15.7797	2.90795
	A24KiL1B	51.0739	14.0407			8h	85.873	39.5075	6	0.926588	0.673617	1.80458	2.25272	2.34432
	A24INiL1B	689.017	87.1322			24h	155.378	31.2242	6	0.99654	4.21344	6.87646	9.16838	0.364544
						72h	111.998	8.00101	6	0.960928	1.68471	3.52266	4.54464	1.33947
	A72GiL1B	13.6442	7.98801			144h	4.0679	1.48929
	A72LiL1B	19.4851	3.60059
	A72SPiL1B	111.998	8.00101		Intestine	Control	1	0.192058
	A72KiL1B	10.1935	2.79358			3h	37.4074	13.0272
	A72INiL1B	1.6647	0.623973			8h	477.794	74.5567
						24h	1093.75	138.314
	A6DGiL1B	0.961352	0.0201946			72h	1.6647	0.623973
	A6DLiL1B	2.19059	1.0527			144h	1.34944	0.571532
	A6DSPiL1B	4.0679	1.48929
	A6DKiL1B	5.32191	2.03386		Kidney	Control	1	0.192058
	A6DINiL1B	1.34944	0.571532			3h	1722.62	255.602
						8h	574.45	36.541
						24h	51.0739	14.0407
						72h	10.1935	2.79358
						144h	5.32191	2.03386
	S. AUREUS TLR2
		MEAN	SE								GILL	LIVER	SPLEEN	KIDNEY	INTESTINE
	S3GT2					TIME POINT	Fold change	SE		1	1	1	1	1	1
	S3LT2				Gill	Control	1	0.192058		1	1	1	1	1	1
	S3SPT2					3h	0.85799	0.392794		1	1	1	1	1	1
	S3KT2					8h	2.67842	0.213164		2	0.842842	1.03886	2.70382	0.104025	0.591179
	S3INT2					24h	1.71223	0.461091		2	1.54578	1.06437	3.18215	0.558644	0.339543
						72h	2.62886	1.05857		2	0.185351	1.28788	5.63728	0.194791	0.47522
	S8GT2					144h	1.31106	0.363957		3	2.91131	4.40762	3.11666	1.4811	4.35196
	S8LT2									3	2.87123	6.65759	4.16986	4.01853	2.8912
	S8SPT2				Liver	Control	1	0.192058		3	2.25272	5.33319	6.56593	6.41597	1.88122
	S8KT2					3h	1.13037	0.0790992		4	1.12117	2.29209	9.02129	9.5909	6.45313
	S8INT2					8h	5.46614	0.652903		4	2.62079	1.63769	4.68592	8.5248	4
						24h	3.06521	1.11642		4	1.39474	5.26585	6.76614	6.39377	15.5625
	S24GT2					72h	10.6826	1.62183		5	1.38831	13.7847	5.34553	3.37137	1.52274
	S24LT2					144h	0.830348	0.0725288		5	1.76337	9.95209	3.98156	2.51112	4.79545
	S24SPT2									5	4.7349	8.31087	3.65111	2.14851	3.74942
	S24KT2				Spleen	Control	1	0.192058		6	0.726986	0.907519	0.906471	0.716978	0.981686
	S24INT2					3h	3.84108	0.908652		6	1.97931	0.685391	1.04488	0.812252	0.786399
						8h	4.61748	1.02056		6	1.22688	0.898132	1.50351	0.787308	0.489145
	S72GT2					24h	6.82445	1.25185
	S72LT2					72h	4.32607	0.518582
	S72SPT2					144h	1.15162	0.180424
	S72KT2
	S72INT2				Intestine	Control	1	0.192058
						3h	0.468647	0.0727153
	S6DGT2					8h	3.04146	0.717189
	S6DLT2					24h	8.67187	3.51733
	S6DSPT2					72h	3.35587	0.965026
	S6DKT2					144h	0.75241	0.143196
	S6DINT2
					Kidney	Control	1	0.192058
						3h	1.60094	0.032346
						8h	3.97186	1.42477
						24h	8.16983	0.939845
						72h	2.677	0.362621
						144h	0.772179	0.0285247

## Sheet: REGRAPH
	iL1B					iL1B
	TIME POINT	Fold change	SE			TIME POINT	Fold change	SE
Gill	Control	1	0.192058		Gill	Control	1	0.192058
	3h	23.3735	9.11296			3h	23.3735	9.11296
	8h	50.501	21.1479			8h	50.501	21.1479
	24h	24.9458	5.36398			24h	24.9458	5.36398
	72h	13.6442	7.98801			72h	13.6442	7.98801
	144h	0.961352	0.0201946			144h	0.961352	0.0201946
Liver	Control	1	0.192058		Liver	Control	1	0.192058
	3h	140.248	32.9416			3h	140.248	32.9416
	8h	10.065	1.49811			8h	110.065	1.49811
	24h	19.1238	4.33203			24h	119.124	4.33203
	72h	19.4851	3.60059			72h	19.4851	3.60059
	144h	2.19059	1.0527			144h	2.19059	1.0527
Spleen	Control	1	0.192058		Spleen	Control	1	0.192058
	3h	29.2307	11.4955			3h	29.2307	11.4955
	8h	85.873	39.5075			8h	85.873	39.5075
	24h	155.378	31.2242			24h	155.378	31.2242
	72h	111.998	8.00101			72h	111.998	8.00101
	144h	4.0679	1.48929			144h	4.0679	1.48929
Intestine	Control	1	0.192058		Intestine	Control	1	0.192058
	3h	37.4074	13.0272			3h	37.4074	13.0272
	8h	477.794	74.5567			8h	238.897	37.2783	3point
	24h	1093.75	138.314			24h	546.874	69.1569	3point
	72h	1.6647	0.623973			72h	1.6647	0.623973
	144h	1.34944	0.571532			144h	1.34944	0.571532
Kidney	Control	1	0.192058		Kidney	Control	1	0.192058
	3h	1722.62	255.602			3h	861.31	127.801	3point
	8h	574.45	36.541			8h	287.225	18.2705	3point
	24h	51.0739	14.0407			24h	51.0739	14.0407
	72h	10.1935	2.79358			72h	10.1935	2.79358
	144h	5.32191	2.03386			144h	5.32191	2.03386
